# Supplementary material
Source: PubMed Central journal article supplement (PMC2923063)

**Figure S1**

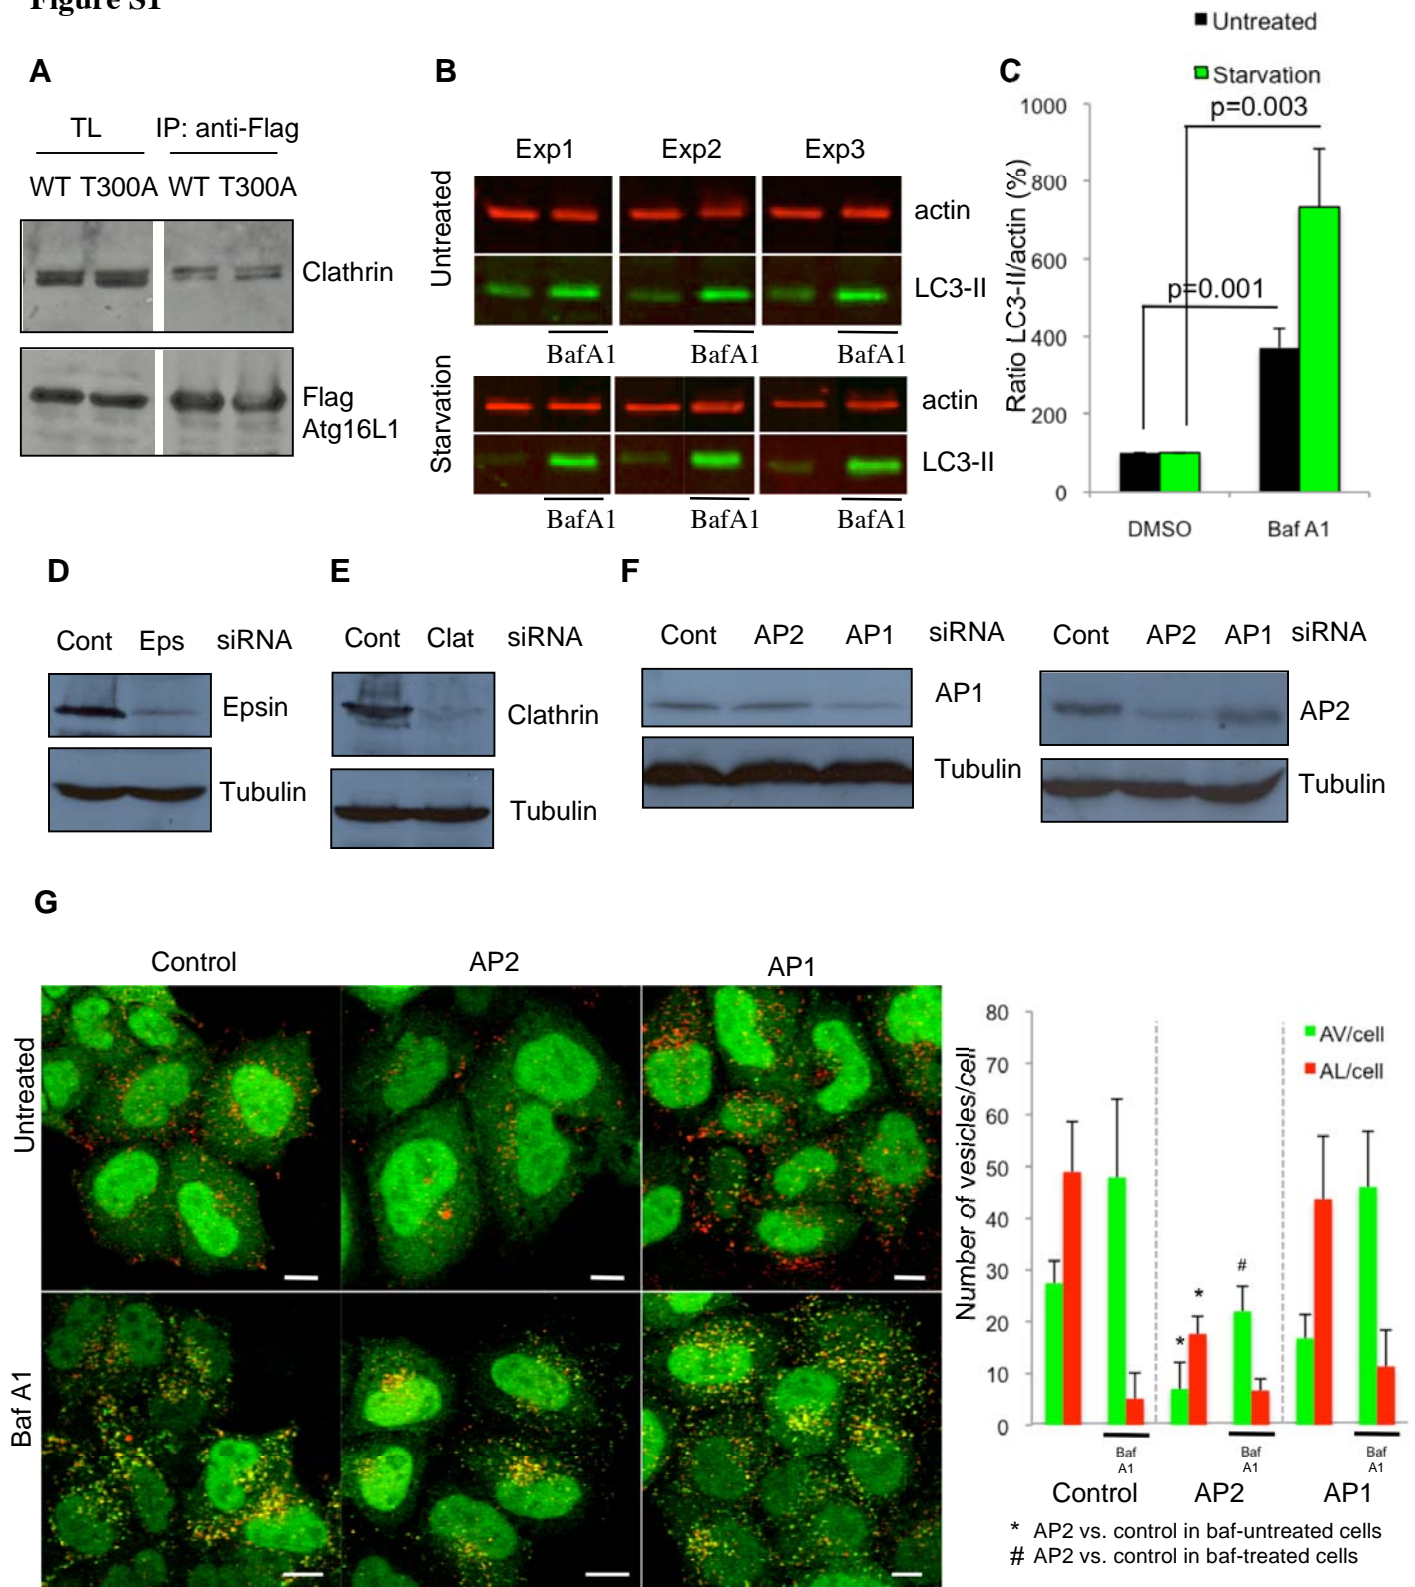

**Figure S2**

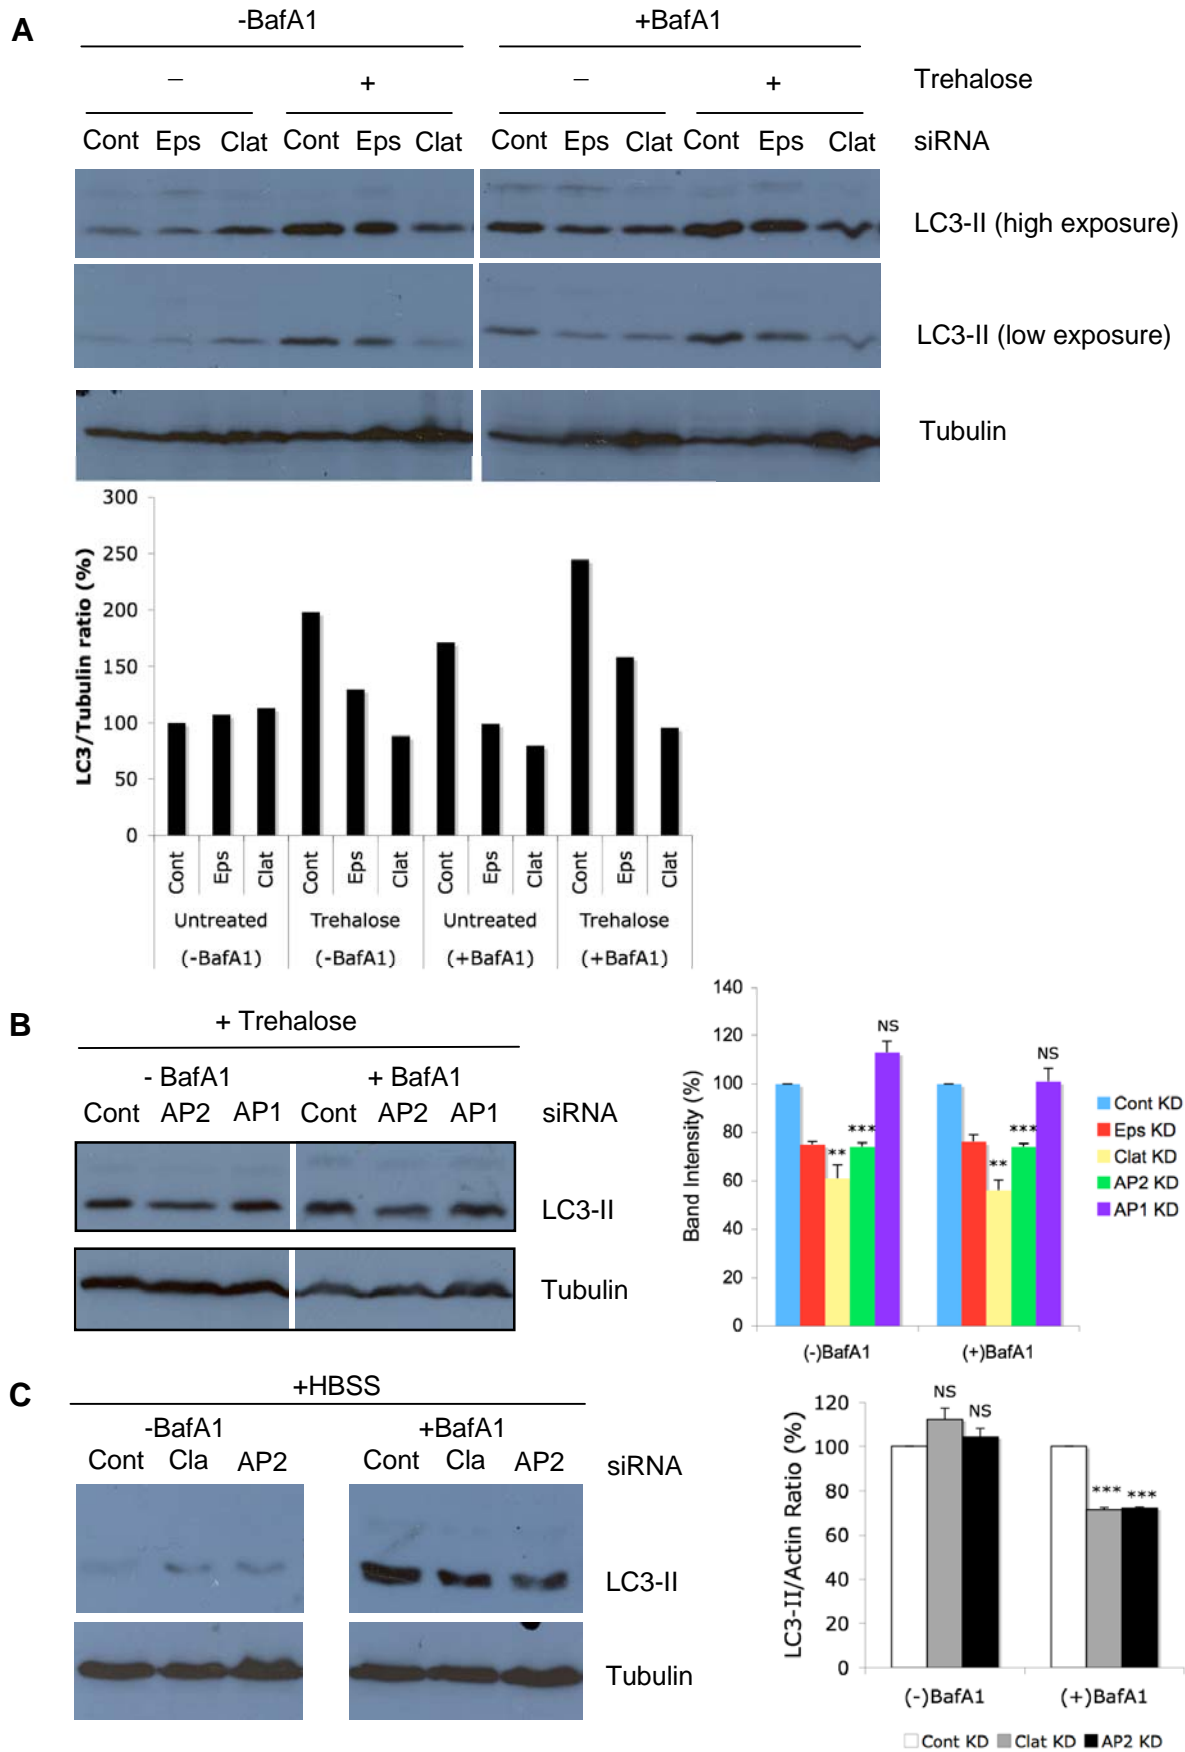

**Figure S3**

**A**

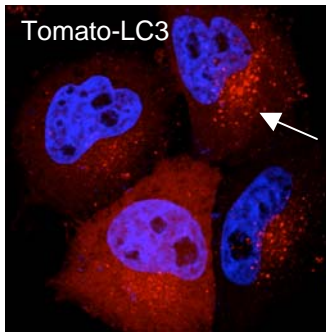

**B**

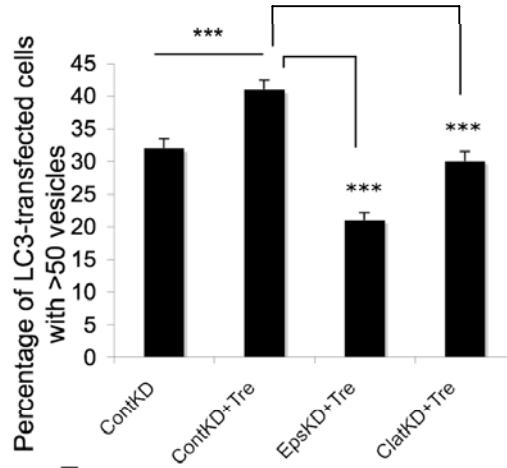

**C**

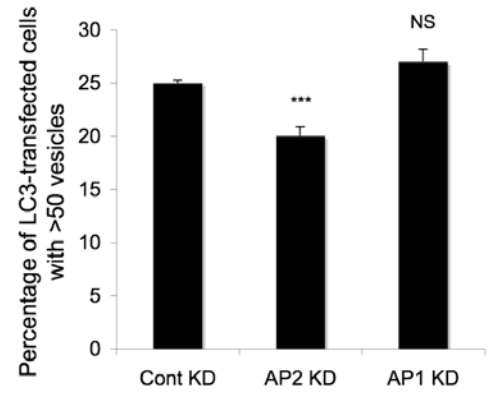

**D**

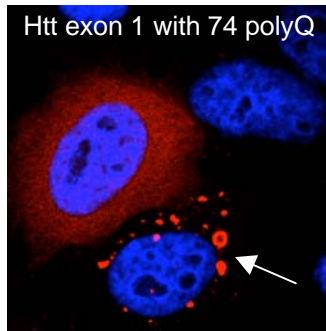

**E**

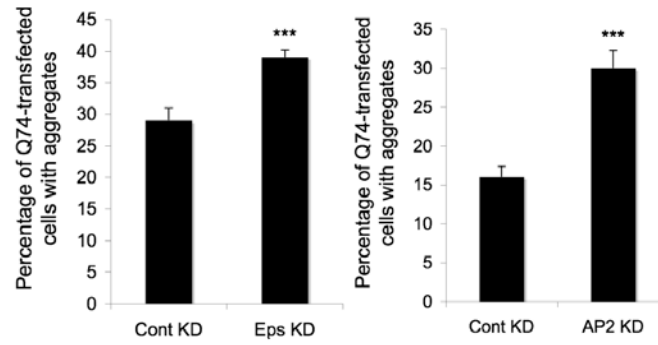

**F**

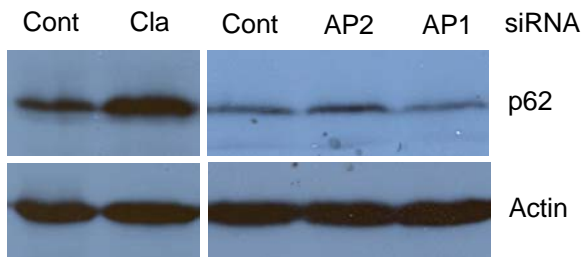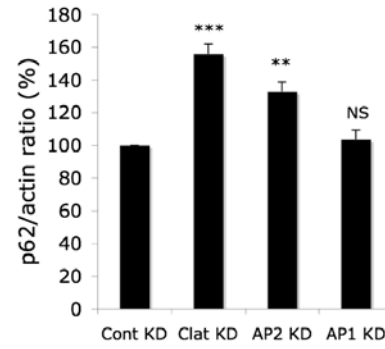

**G**

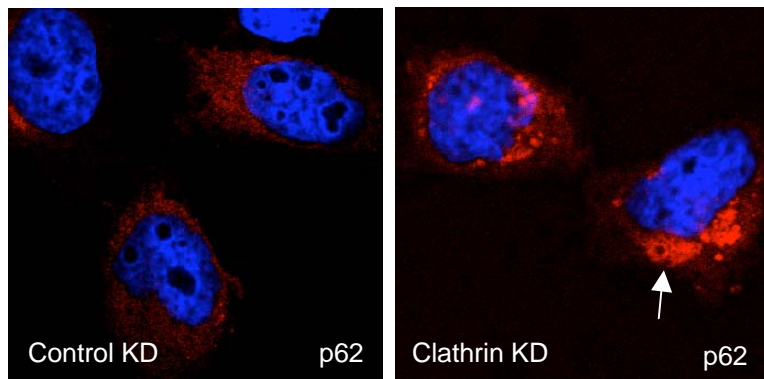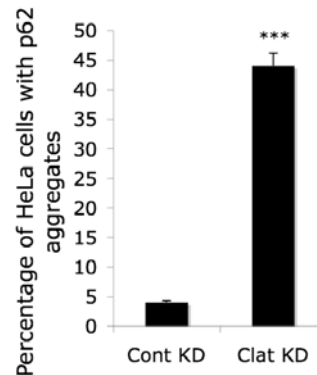

**Figure S4**

**A**

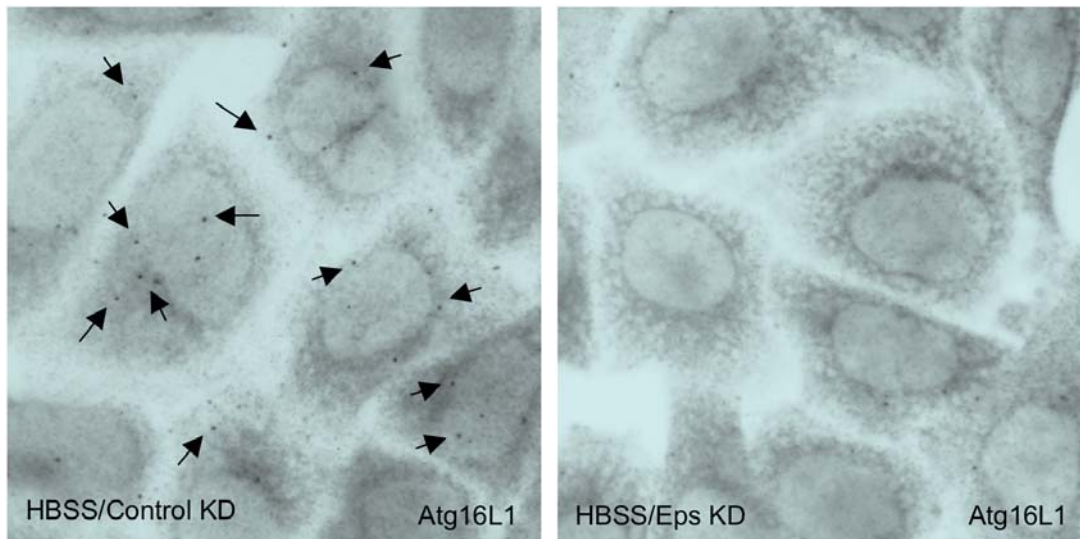

**B**

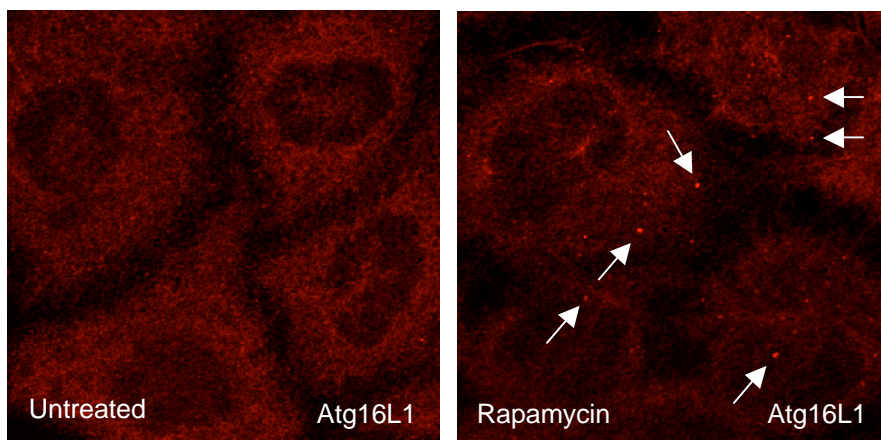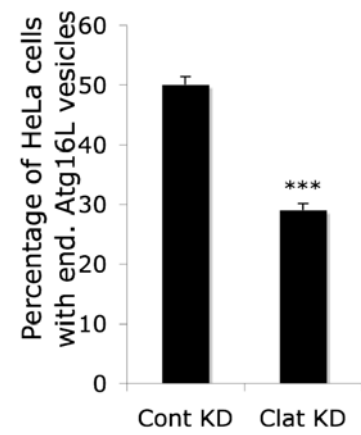

**C**

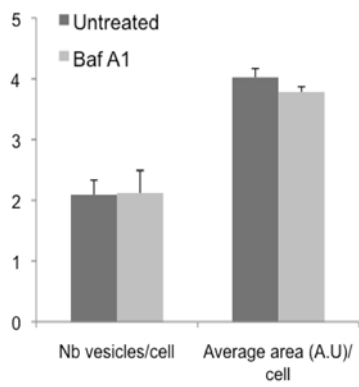

**Figure S5**

**A**

Cholera toxin SubB-Alexa555 (red)  
GFP-Atg16L1 (green)

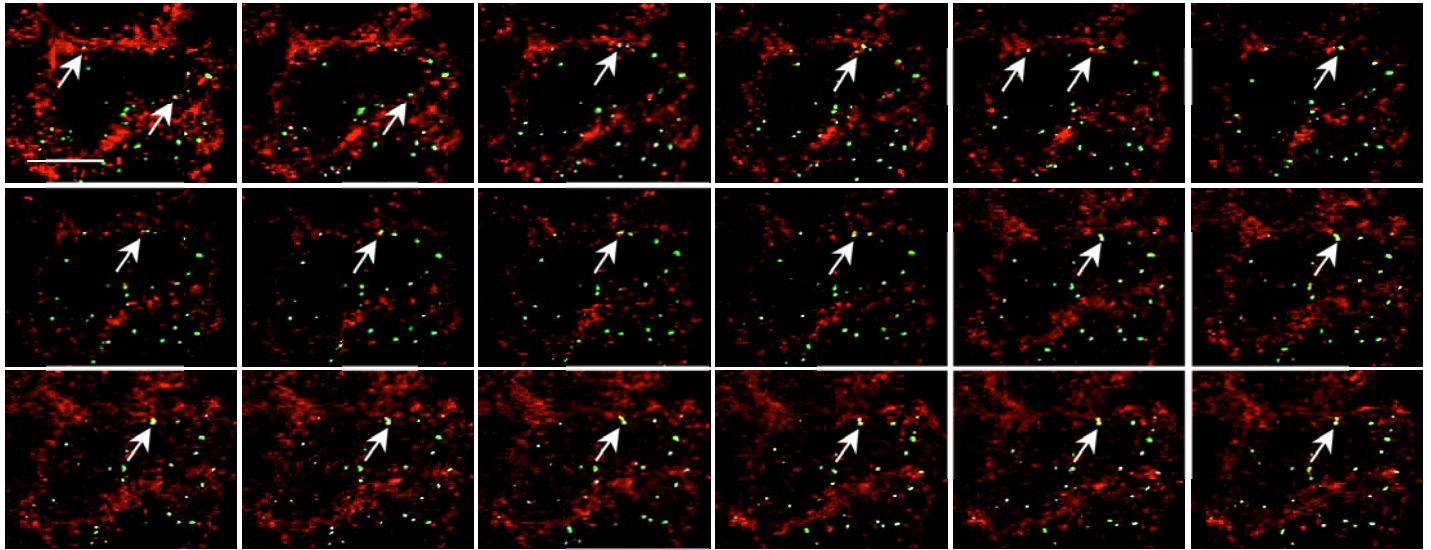

**B**

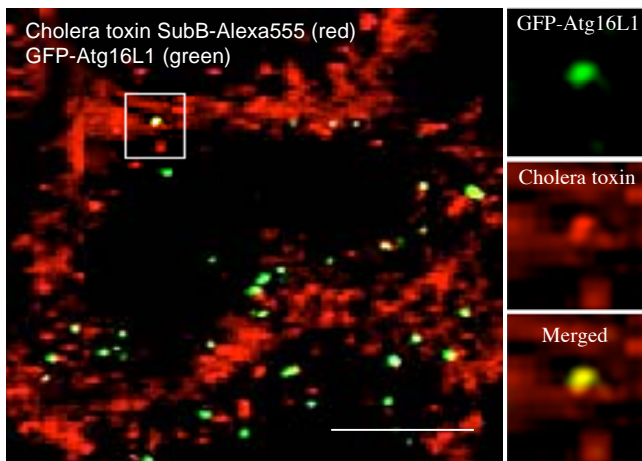

**C**

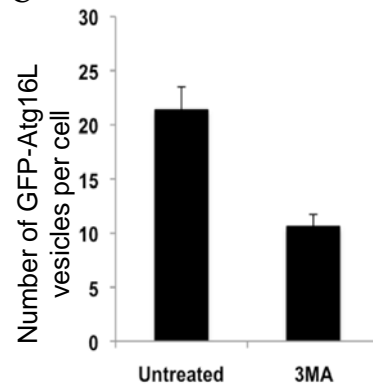

**D**

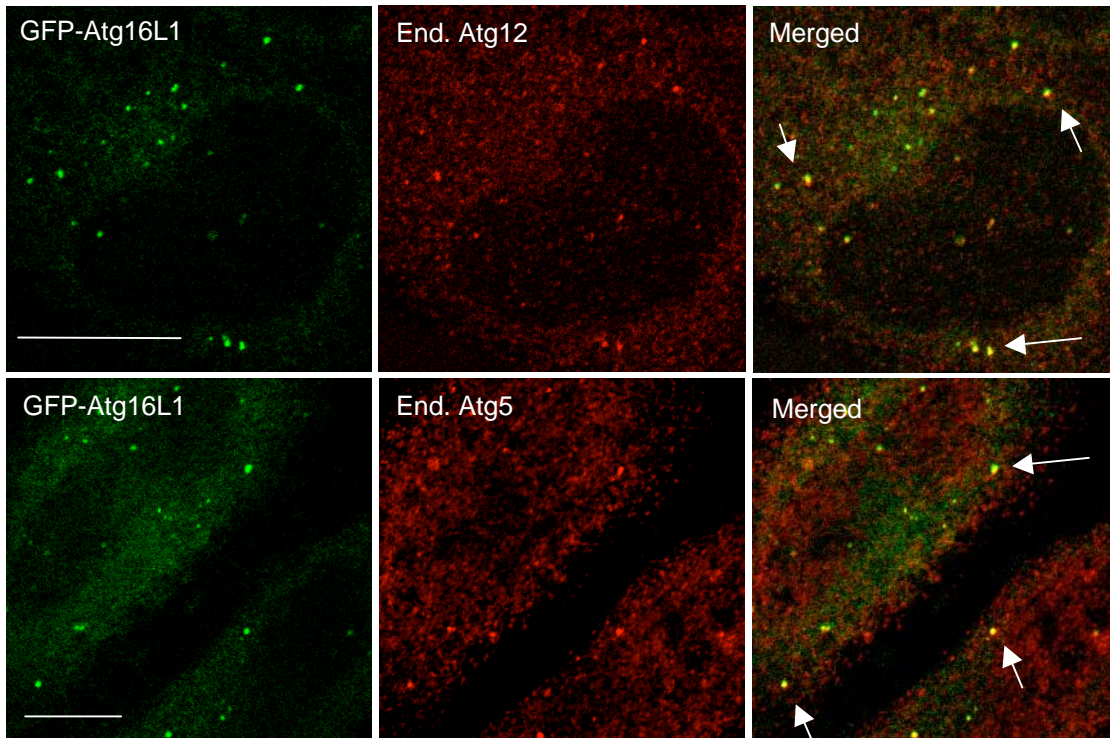

**Figure S6**

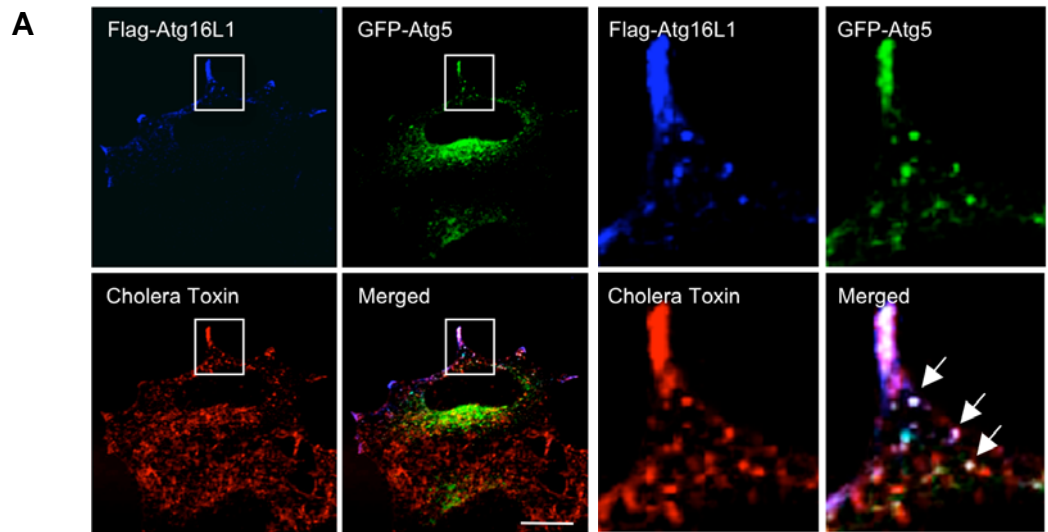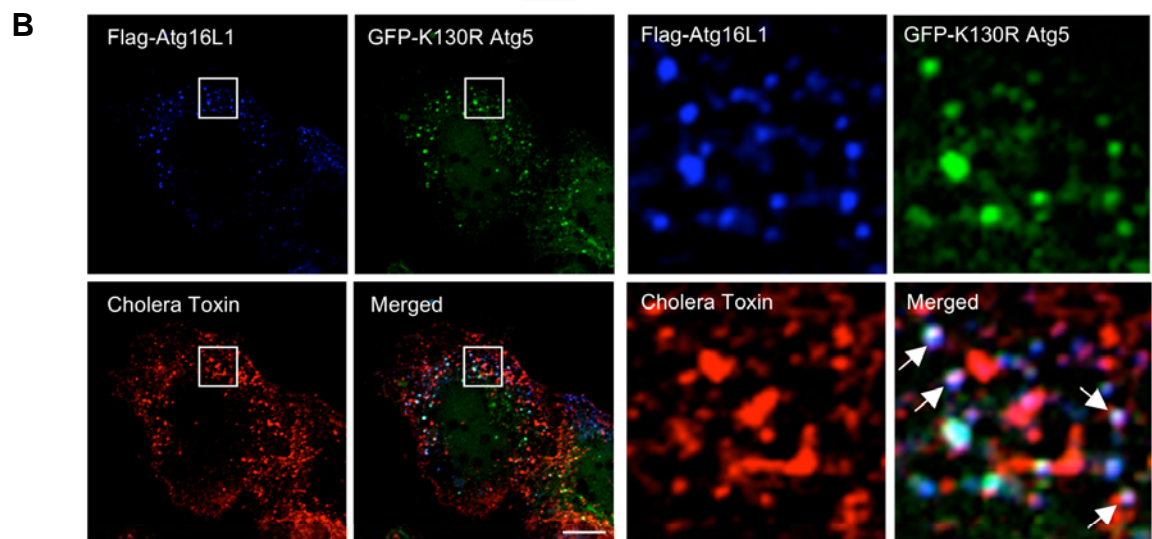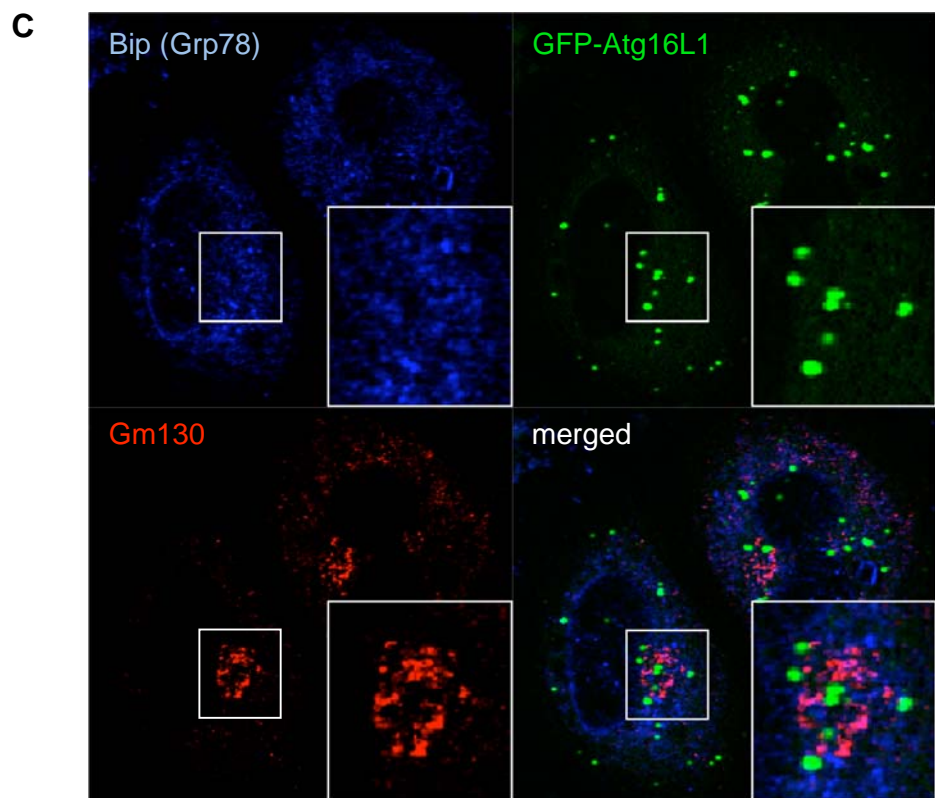

**Figure S7**

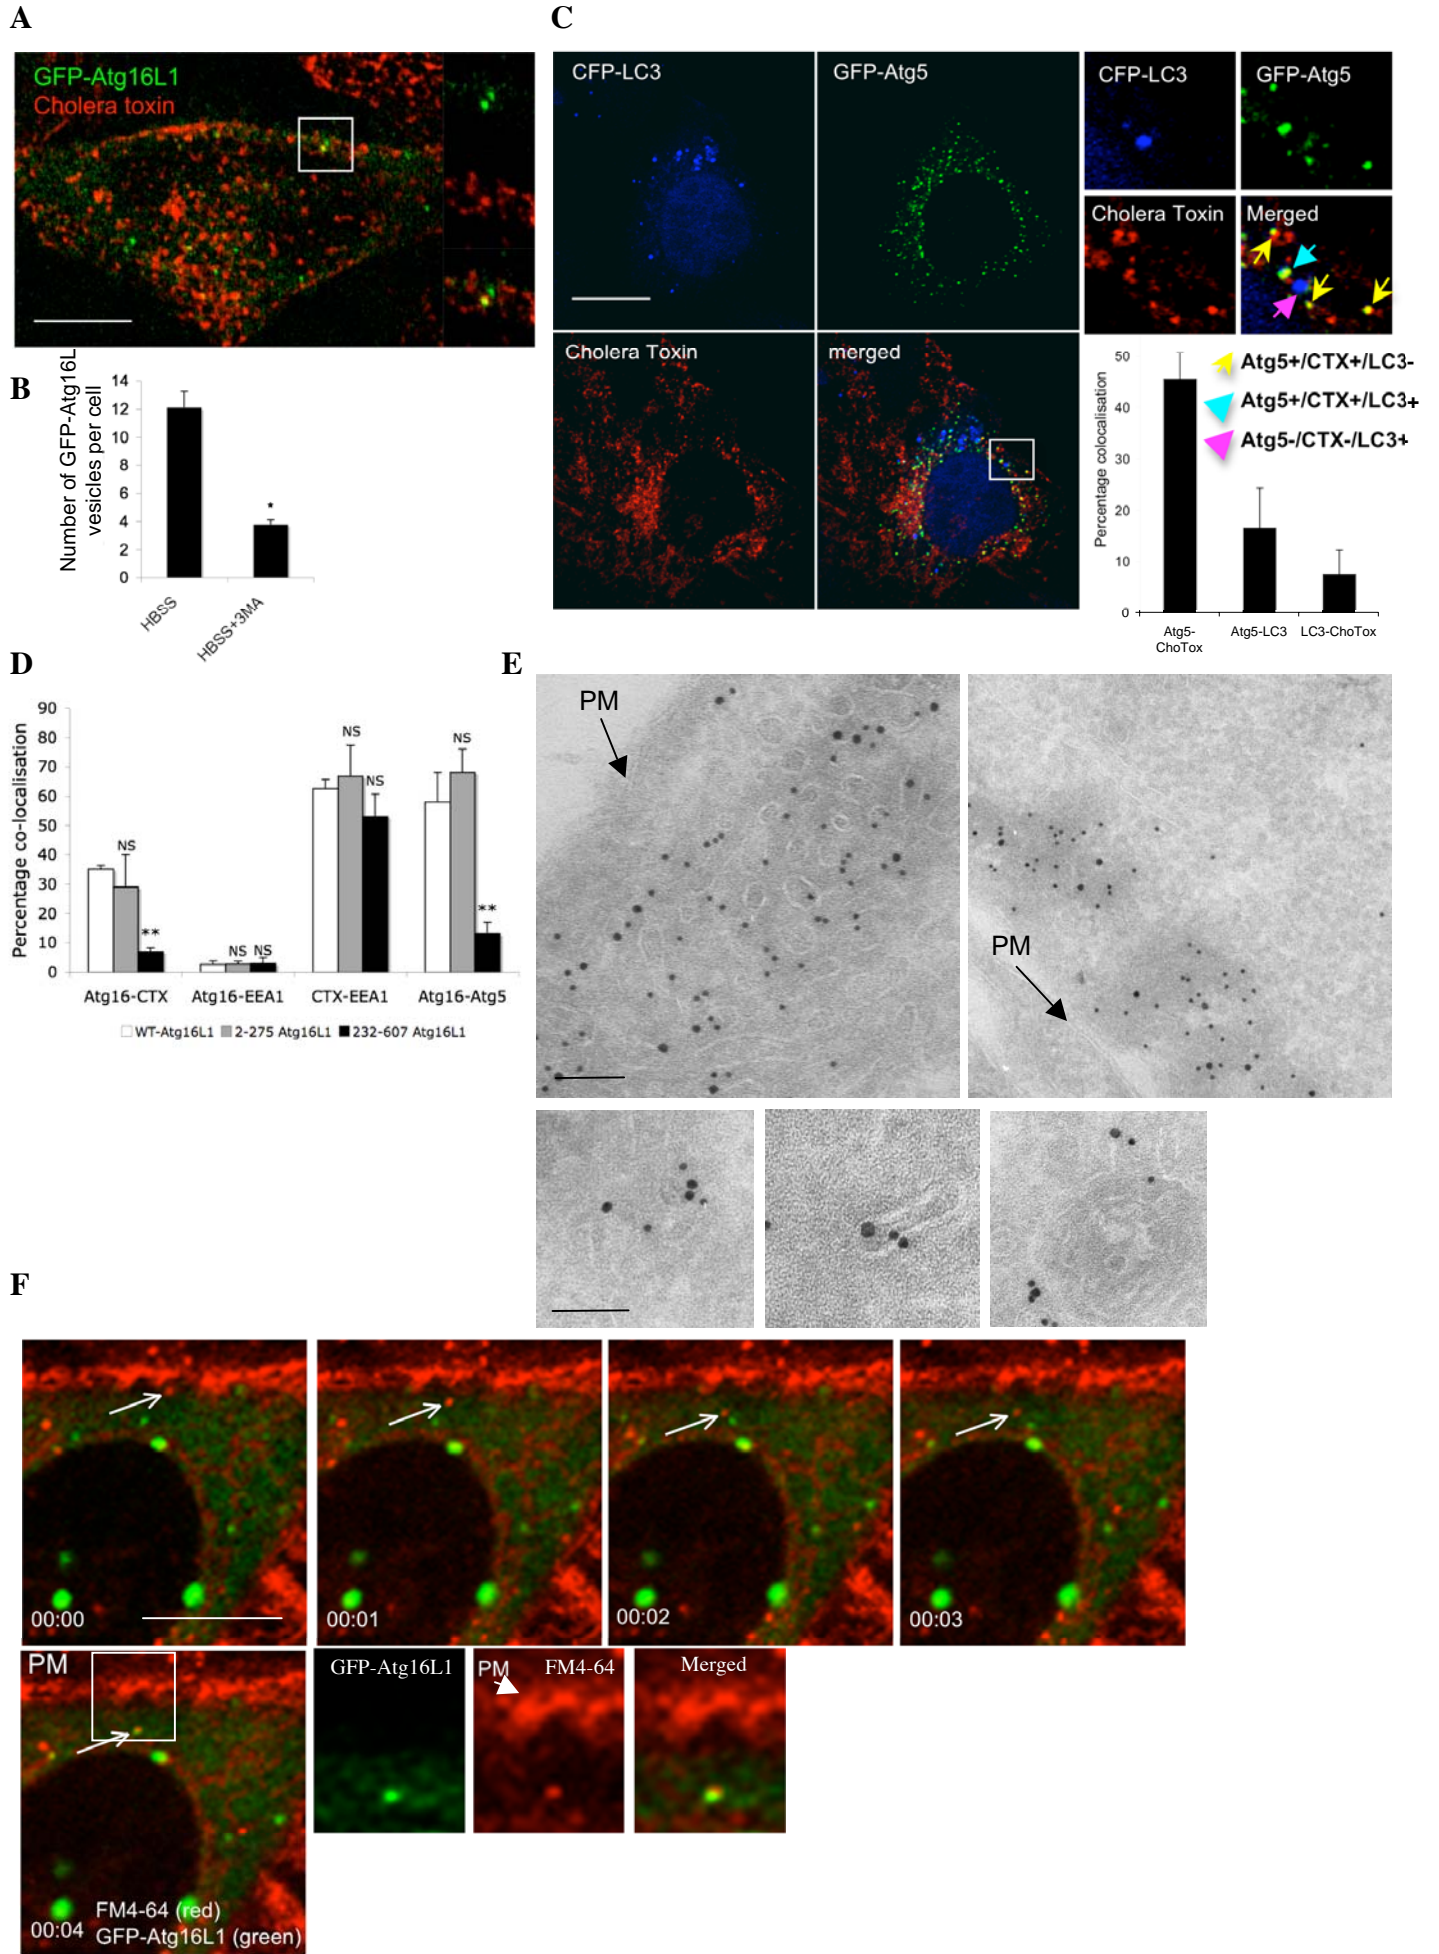

**Figure S8**

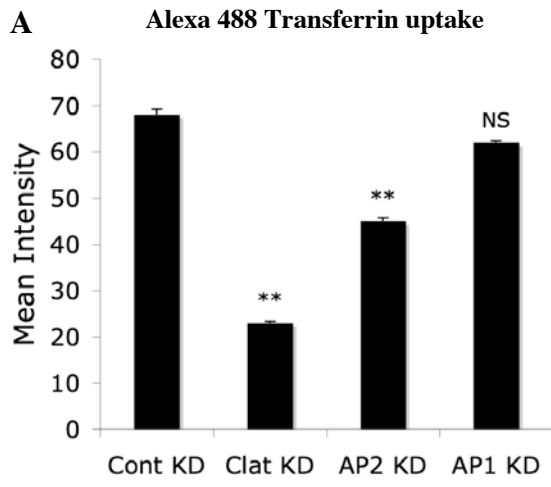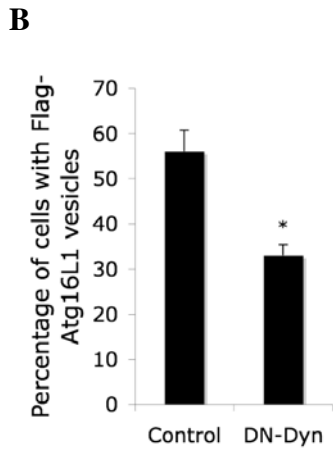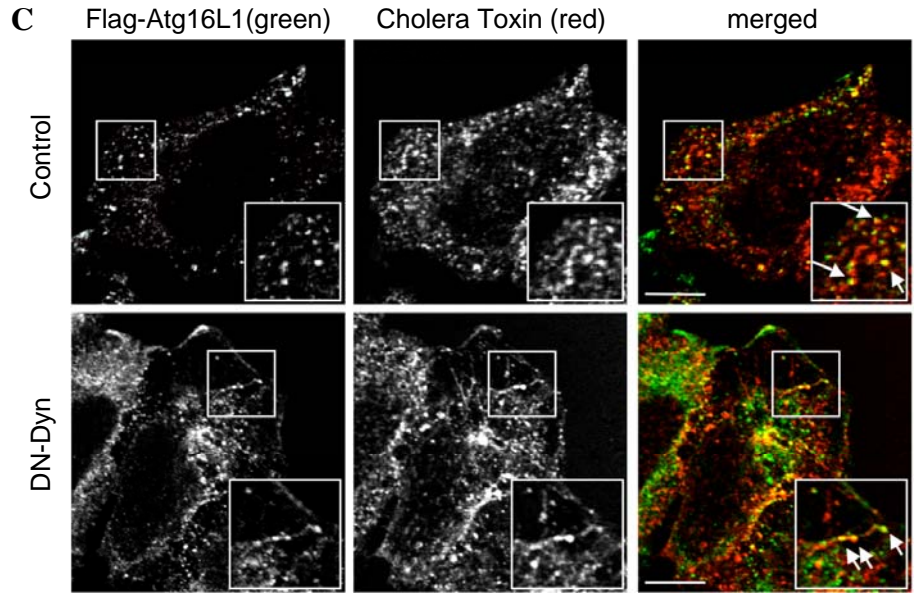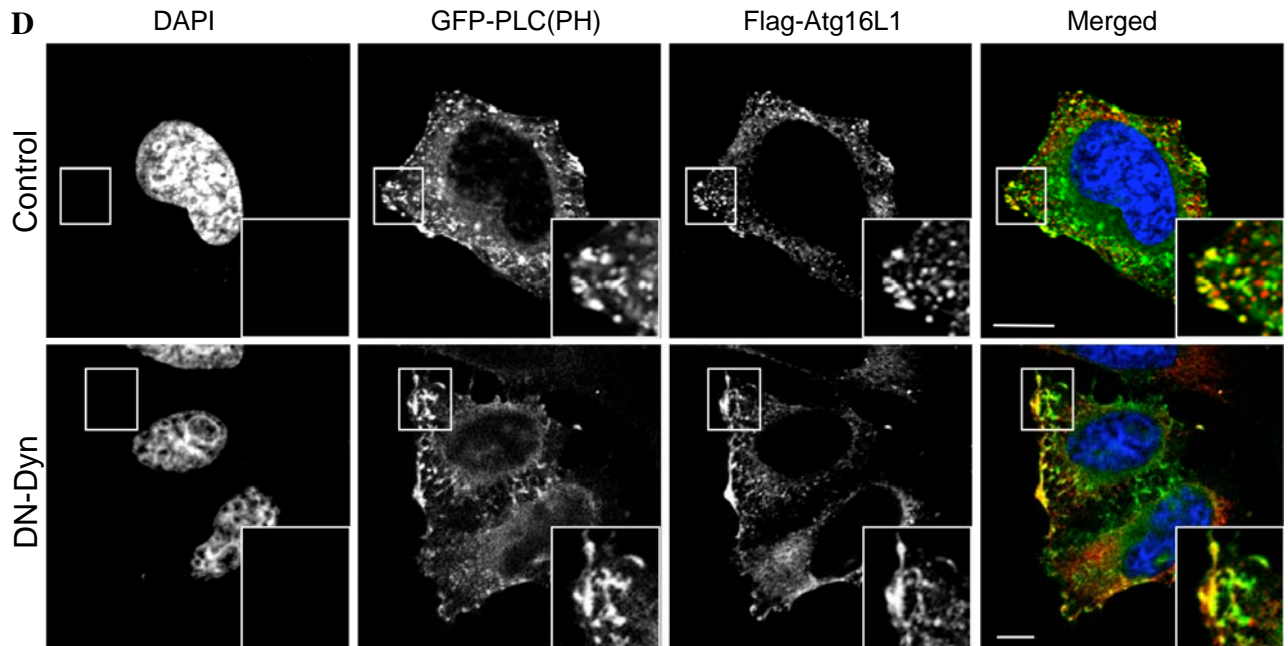

Supplement: NIHMS31244-supplement-2.pdf [file NIHMS31244-supplement-2.pdf]
