# Supplementary material
Source: PubMed Central journal article supplement (PMC2923063)

Figure 1C

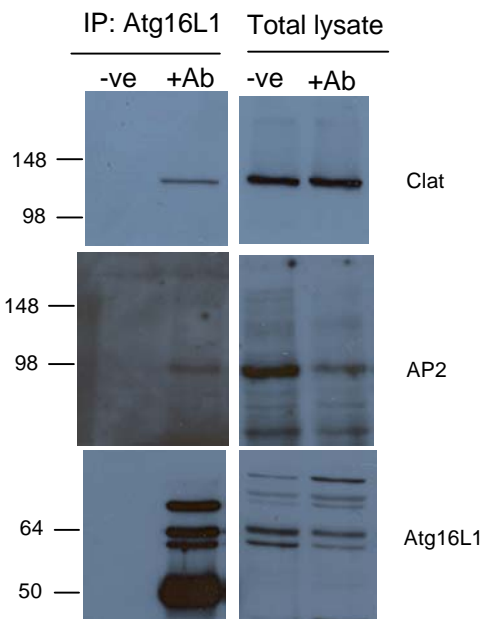

Figure 2A (left)

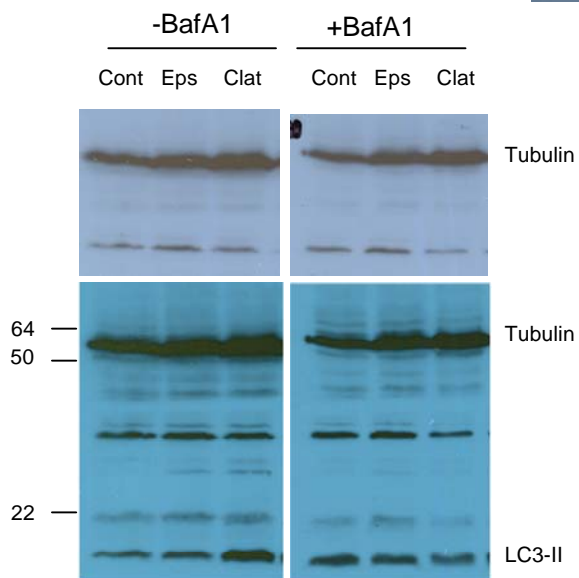

Figure 2A (right)

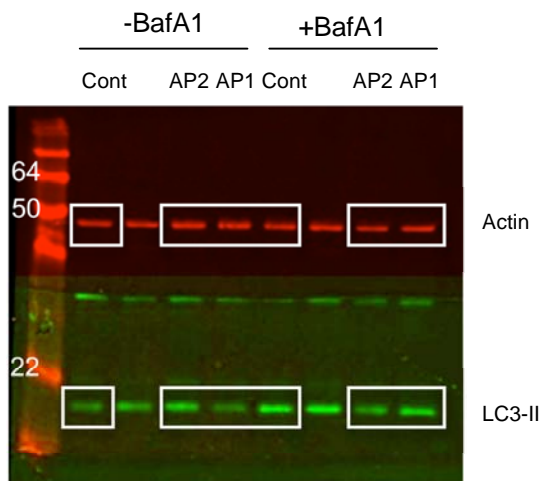

Figure 8A

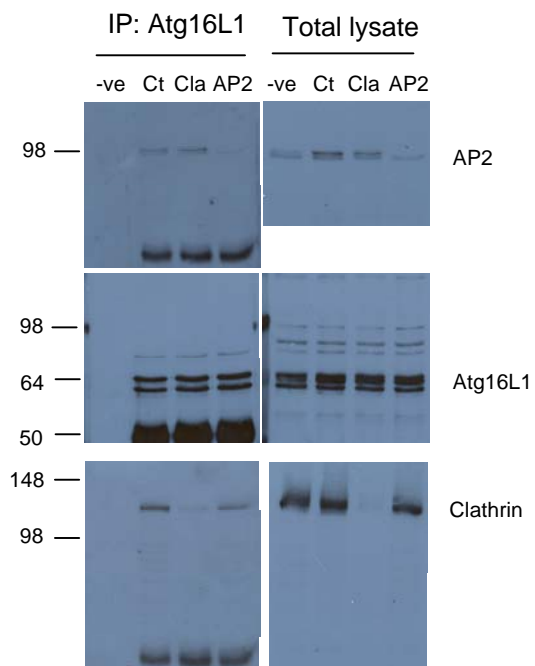

Figure 8C

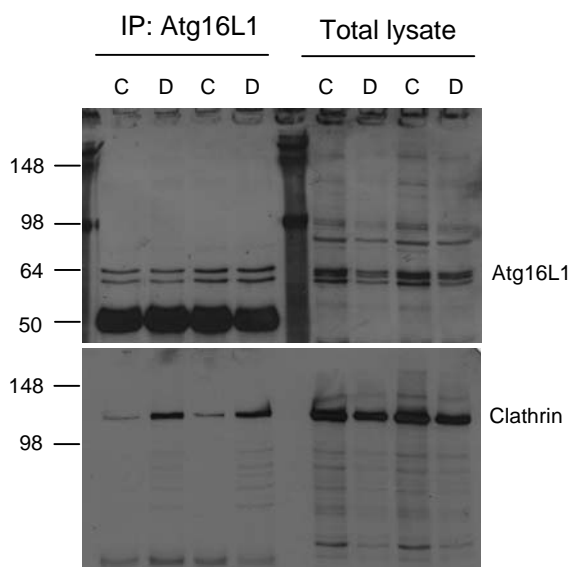

Supplement: NIHMS31244-supplement-3.pdf [file NIHMS31244-supplement-3.pdf]
